# Supplementary material for: Butaphosphan Effects on Glucose Metabolism Involve Insulin Signaling and Depends on Nutritional Plan
Source: PubMed Central journal article supplement (PMC7353219; doi:10.3390/nu12061856), 2020-06-22
Supplement: nutrients-12-01856-s001.pdf [file nutrients-12-01856-s001.pdf]

**Table S1.** Primers sequence for qRT PCR.

| <b>Gene</b>     | <b>Official name</b>                                                    | <b>Forward (5' → 3')</b> | <b>Reverse (5 → 3')</b> |
|-----------------|-------------------------------------------------------------------------|--------------------------|-------------------------|
| <i>FoxO1</i>    | Forkhead box O1                                                         | GCTTTTGTCCAGATGGAGGT     | CGCACAGAGCACTCCATAAA    |
| <i>Irs1</i>     | Insulin receptor substrate 1                                            | ATGGCGAGAGCCCTCCGGATACC  | CTCATAATACTCCAGGCGCGC   |
| <i>Irs2</i>     | Insulin receptor substrate 2                                            | GCCCGAACCTCAATAACAAC     | CTTGTGGCCGTGCTTCTG      |
| <i>PI3K</i>     | Phosphatidylinositol 3-kinase                                           | TAGCTGCATTGGAGCTCCTT     | TACGAACTGTGGGAGCAGAT    |
| <i>Ppargc1a</i> | Peroxisome proliferative activated receptor, gamma, coactivator 1 alpha | GTCAACAGCAAAAGCCACAA     | TCTGGGGTCAGAGGAAGAGA    |
| <i>Pck1</i>     | Phosphoenolpyruvate carboxykinase 1                                     | GACAGCCTGCCCCAGGCAGTGA   | CTGGCCACATCTCGAGGGTCAG  |
| <i>Gck</i>      | Glucokinase                                                             | GAGATGGATGTGGTGGCAAT     | ACCAGCTCCACATTCTGCAT    |
| <i>Fbp1</i>     | Fructose bisphosphatase 1                                               | GACCCCTGCCATCAATGAGTA    | GTTGGCGGGGTATAAAAAGA    |
| <i>G6pc</i>     | Glucose-6-phosphatase                                                   | TGCTGCTCACTTTCCCCACCAG   | TCTCCAAAGTCCACAGGAGGT   |
| <i>Acaca</i>    | Acetyl-Coenzyme A carboxylase                                           | GGACAGACTGATCGCAGAGAAAG  | GCTGTTCTCAGGCTCACAT     |
| <i>Acox1</i>    | Acyl-Coenzyme A oxidase 1                                               | GTGCAGCTCAGAGTCTGTCCAA   | TACTGCTGCGTCTGAAAATCCA  |
| <i>Cpt1a</i>    | Carnitine palmytoil transferase 1                                       | CTCCATGACTCGGCTCTTC      | AGCTTGAACCTCTGCTCTGC    |

\*primer sequences were blasted using Blastn.
